# Supplementary material for: Biobased Cryogels from Enzymatically Oxidized Starch: Functionalized Materials as Carriers of Active Molecules
Source: PubMed Central journal article supplement (PMC7321214; doi:10.3390/molecules25112557), 2020-05-31
Supplement: molecules-25-02557-s001.pdf [file molecules-25-02557-s001.pdf]

# Biobased cryogels from enzymatically oxidized starch: functionalized materials as carriers of active molecules

Antonella Caterina Boccia<sup>1\*</sup>, Guido Scavia<sup>1</sup>, Ilaria Schizzi<sup>2</sup>, Lucia Conzatti<sup>2</sup>

<sup>1</sup> Institute for Chemical Sciences and Technologies-SCITEC "G. Natta", CNR, Via Corti, 12, 20133 Milano, Italy; [antonella.boccia@scitec.cnr.it](mailto:antonella.boccia@scitec.cnr.it); [guido.scavia@scitec.cnr.it](mailto:guido.scavia@scitec.cnr.it);

<sup>2</sup> Institute for Chemical Sciences and Technologies-SCITEC "G. Natta", CNR, Via De Marini, 6, 16149 Genova, Italy; [lucia.conzatti@cnr.it](mailto:lucia.conzatti@cnr.it); [ilaria.schizzi@scitec.cnr.it](mailto:ilaria.schizzi@scitec.cnr.it).

\* Correspondence: [antonella.boccia@scitec.cnr.it](mailto:antonella.boccia@scitec.cnr.it); Tel.: +39 02 236 99 212

**Table S1.** Peculiar chemical shifts for  $^1\text{H}$  species of modified PS

| $^1\text{H}$     | Chemical shift <sup>1</sup> |
|------------------|-----------------------------|
| H-1              | 5.11                        |
| H-2              | 4.76                        |
| H-3              | 5.16                        |
| H-4,5            | 3.90 – 4.10                 |
| H-6              | 4.56 – 4.60                 |
| H <sub>ald</sub> | 9.23-9.28                   |

<sup>1</sup> Chemical shifts are expressed in ppm

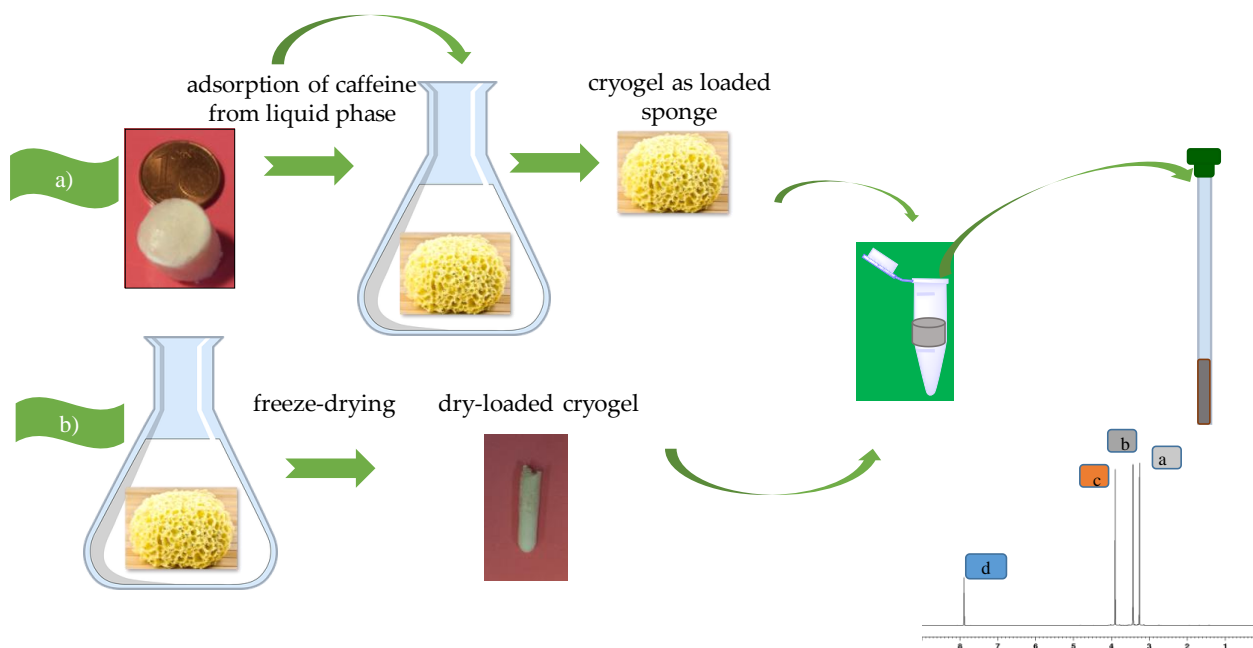

**Figure S1.** Experimental scheme illustrating the procedure for sorption/desorption of caffeine.

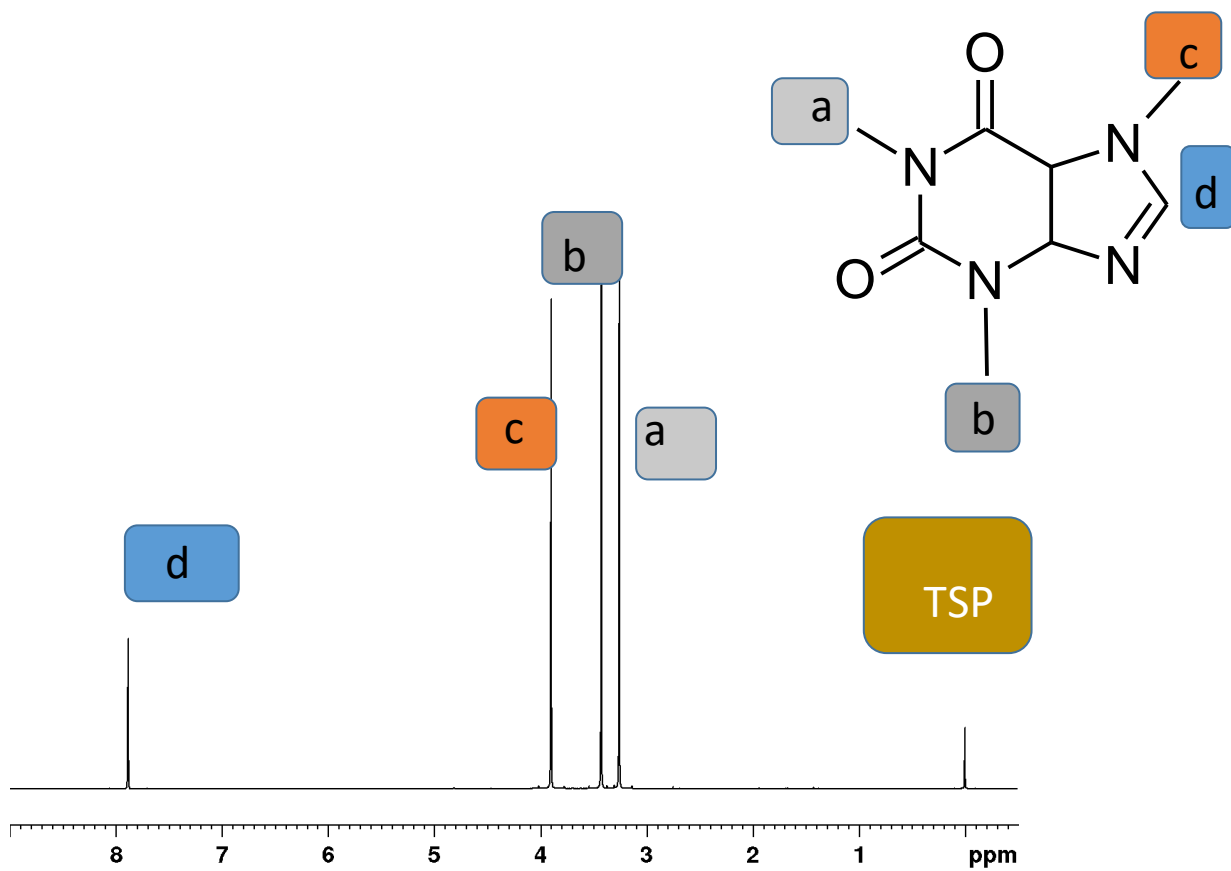

**Figure S2.**  $^1\text{H}$  NMR spectrum of caffeine, recorded at 298 K, in  $\text{D}_2\text{O}$ .

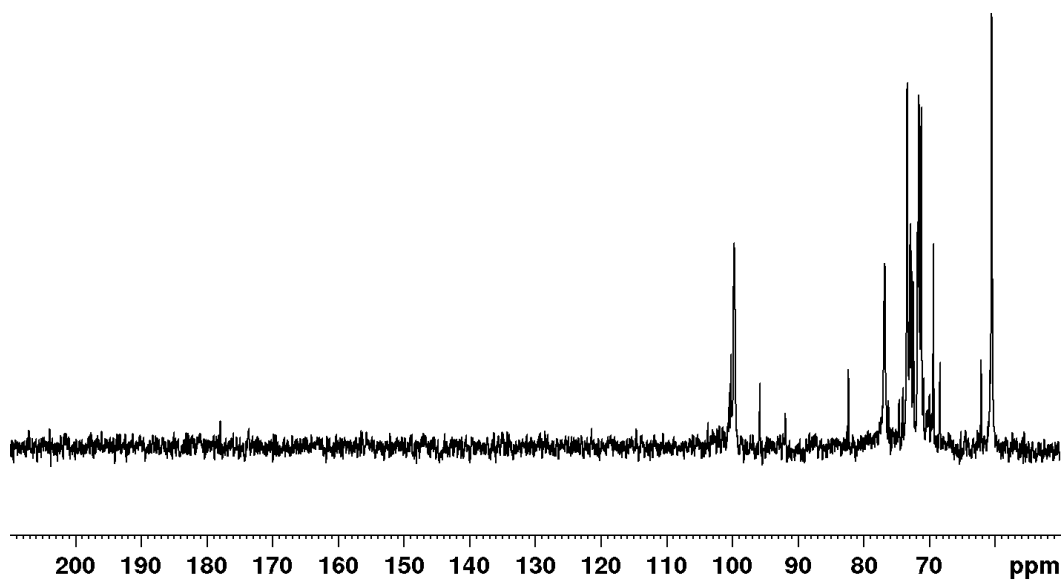

**Figure S3.**  $^{13}\text{C}$  NMR spectrum of partially oxidized pea starch, (sample C), recorded at 298 K, in  $\text{D}_2\text{O}$ .

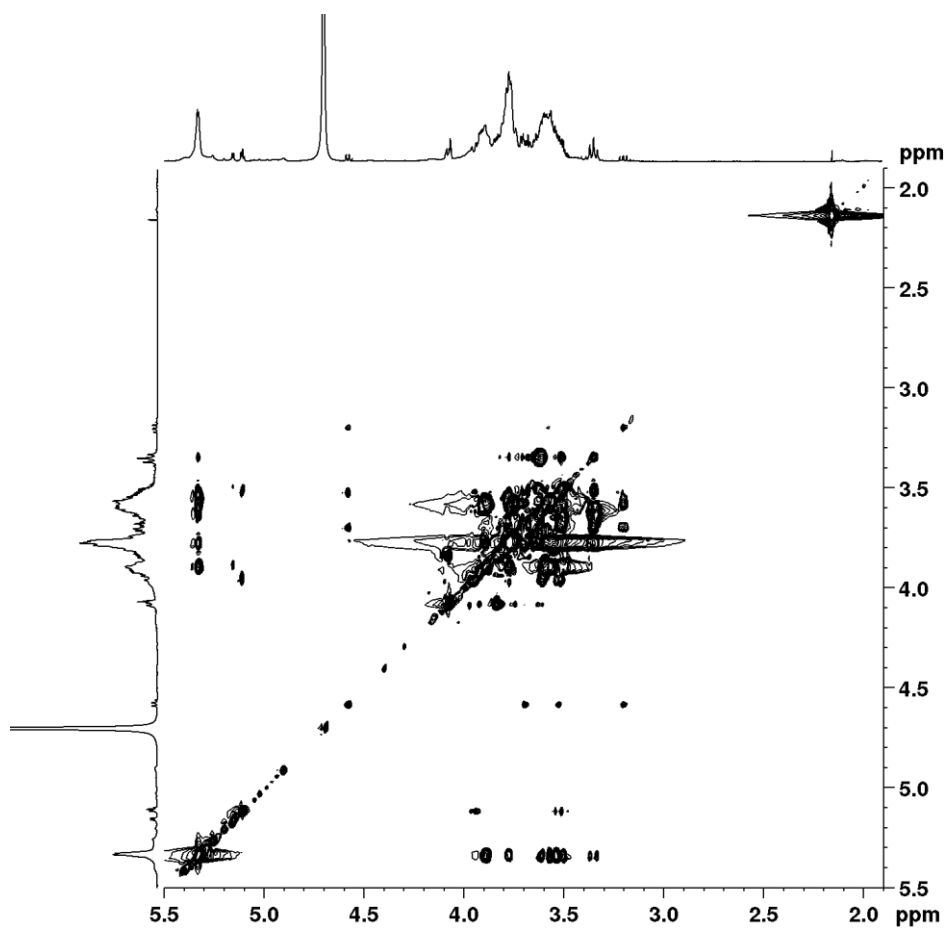

**Figure S4.**  $^1\text{H}$ - $^1\text{H}$  TOCSY spectrum of partially oxidized pea starch, (from sample C), recorded at 298 K, in D<sub>2</sub>O.
